# Supplementary material for: Isotopic diffusion in ice enhanced by vein-water flow
Source: Copernicus journal article supplement (doi:10.5194/tc-17-3063-2023), 2023-07-26
Supplement: Supplementary file 1 [file tc-17-3063-2023-supplement.pdf]

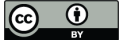

*Supplement of*

## **Isotopic diffusion in ice enhanced by vein-water flow**

**Felix S. L. Ng**

*Correspondence to:* Felix S. L. Ng (f.ng@sheffield.ac.uk)

The copyright of individual parts of the supplement might differ from the article licence.

- 5 Movies S1–S3: Here, captions only. Access the movies via doi:10.15131/shef.data.21805803  
Please use <https://figshare.com/s/79e62bdae0f84a2efa11> during the review stage.

Figs. S1–S3

---

- 10 **Movie S1.** Influence of the vein-water flow velocity  $w$  on the pattern of  $\delta$  in the ice–vein system and on the amount of excess diffusion at  $T = -32$  °C, for a signal with wavelength  $\lambda = 0.02$  m. These simulations show how the isotopic “shear layer” described in Sect. 3 evolves and transitions between the sheet regime and tail regime as  $w$  changes in small steps from  $-50$  m  $\text{yr}^{-1}$  to  $50$  m  $\text{yr}^{-1}$  and back, for the model parameters  $a = 1$   $\mu\text{m}$ ,  $b = 1$  mm and  $\alpha = 1$ . (a)  $\delta$ -variations at the vein (red curve) and in the grain interior at  $r = b$  (black curve). (b) Colour map of the pattern of  $\delta$  in the ice. (c) The corresponding decay-rate
- 15 enhancement factor  $f$  (white dot), located on the surface of  $f(\lambda, w)$  in Fig. 7a.

**Movie S2.** Influence of vein-water flow velocity  $w$  on the pattern of  $\delta$  in the ice–vein system and on the amount of excess diffusion at  $T = -32$  °C, for a signal with wavelength  $\lambda = 0.08$  m. The simulation scheme and layout of panels are the same as in Movie S1.

- Movie S3.** Compressional scaling of the surfaces of (a) signal decay-rate enhancement factor  $f$ , (b)  $\log_{10}f$  and (c) signal
- 20 migration velocity  $v$ , over the  $\lambda$ – $w$  parameter space, as temperature decreases from  $-20$  °C to  $-60$  °C. Some axis ranges are updated at  $-35$  °C and  $-47$  °C to focus on relevant variations.

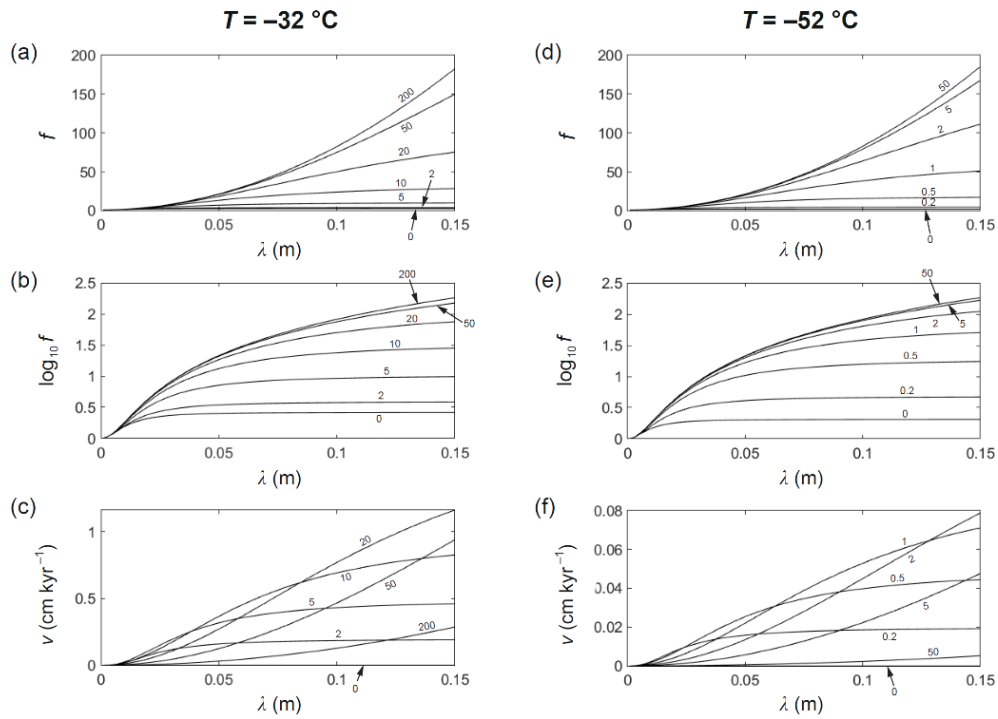

**Figure S1.** Computed curves of signal decay-rate enhancement factor  $f$ ,  $\log_{10} f$  and signal migration velocity  $v$  versus signal wavelength  $\lambda$ , at (a–c)  $T = -32\text{ °C}$  and (d–f)  $T = -52\text{ °C}$ , for different vein-water flow velocities  $w$  (curve labels in m yr $^{-1}$ ) and assuming the deuterium–hydrogen fractionation coefficient,  $\alpha = 1.021$ . These curves differ negligibly from those in Fig. 6, where  $\alpha = 1$  is assumed. Results based on the  $^{18}\text{O}$ – $^{16}\text{O}$  fractionation coefficient,  $\alpha = 1.0029$ , are still closer to those in Fig. 6.

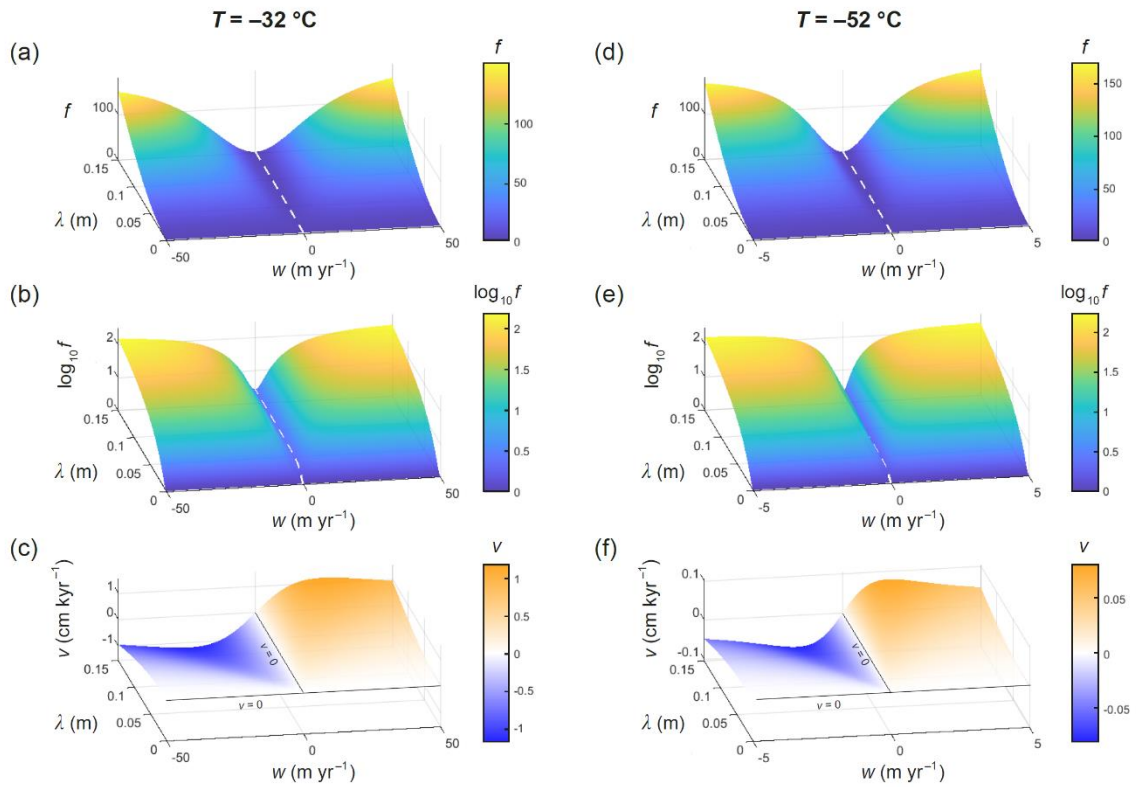

**Figure S2.** Surfaces of the signal decay-rate enhancement factor  $f$ ,  $\log_{10}f$  and signal migration velocity  $v$  over the  $\lambda$ – $w$  parameter space, computed for (a–c)  $T = -32\text{ °C}$  and (d–f)  $T = -52\text{ °C}$  and assuming the deuterium–hydrogen fractionation coefficient,  $\alpha = 1.021$ . These surfaces differ negligibly from those in Fig. 7, where  $\alpha = 1$  is assumed. Results based on the

45 <sup>18</sup>O–<sup>16</sup>O fractionation coefficient,  $\alpha = 1.0029$ , are still closer to those in Fig. 7.

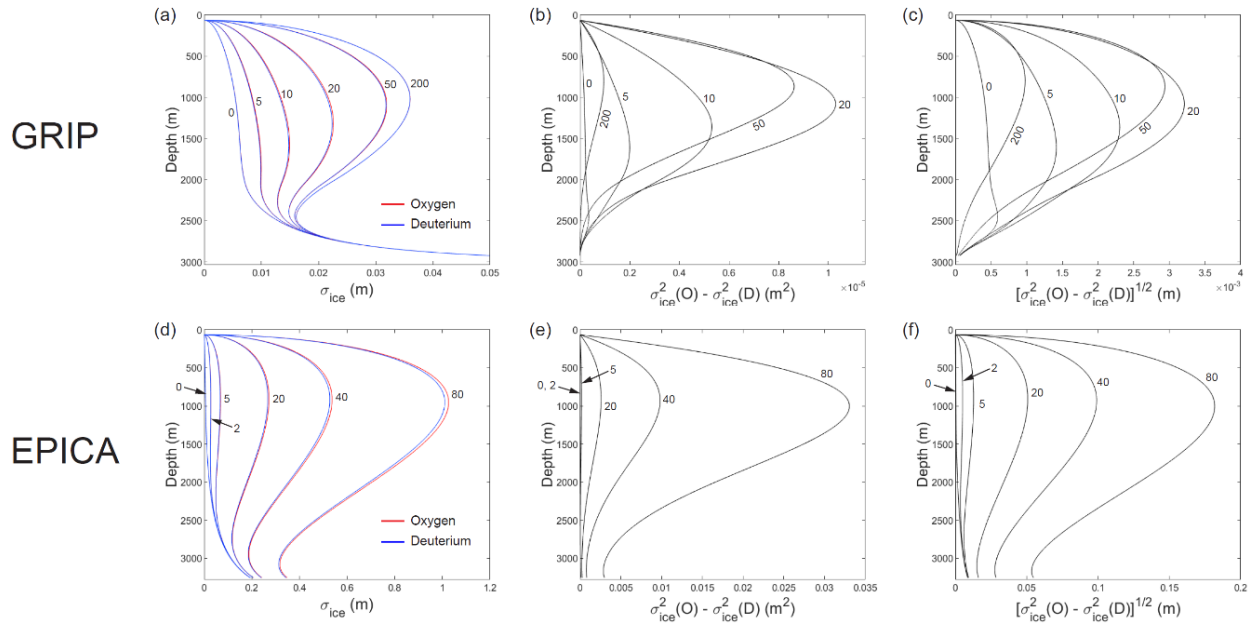

**Figure S3.** A study of the ice contribution to the differential diffusion length at the (a–c) GRIP and (d–f) EPICA ice-core sites, in model runs using constant grain radius  $b = 2$  mm and different vein-water flow velocities  $w$  (curve labels in  $\text{m yr}^{-1}$ ). Depth profiles of (a, d) the ice diffusion lengths  $\sigma_{\text{ice}}(\text{O})$  and  $\sigma_{\text{ice}}(\text{D})$ , (b, e) the square differential  $\Delta\sigma_{\text{ice}}^2 = \sigma_{\text{ice}}^2(\text{O}) - \sigma_{\text{ice}}^2(\text{D})$ , and (c, f) the differential  $\Delta\sigma_{\text{ice}}$ .
